# Supplementary material for: Transoral Robotic Surgery for Oropharyngeal Squamous Cell Carcinoma of the Tonsil versus Base of Tongue: A Systematic Review and Meta-Analysis
Source: MDPI journal article supplement (doi:10.3390/cancers14153837), 2022-08-08
Supplement: s1 [file s1]

# Supplementary Material: Transoral Robotic Surgery for Oropharyngeal Squamous Cell Carcinoma of the Tonsil versus Base of Tongue: A Systematic Review and Meta-Analysis

Nicolas S Poupore, Tiffany Chen, Shaun A Nguyen, Cherie-Ann O Nathan and Jason G Newman

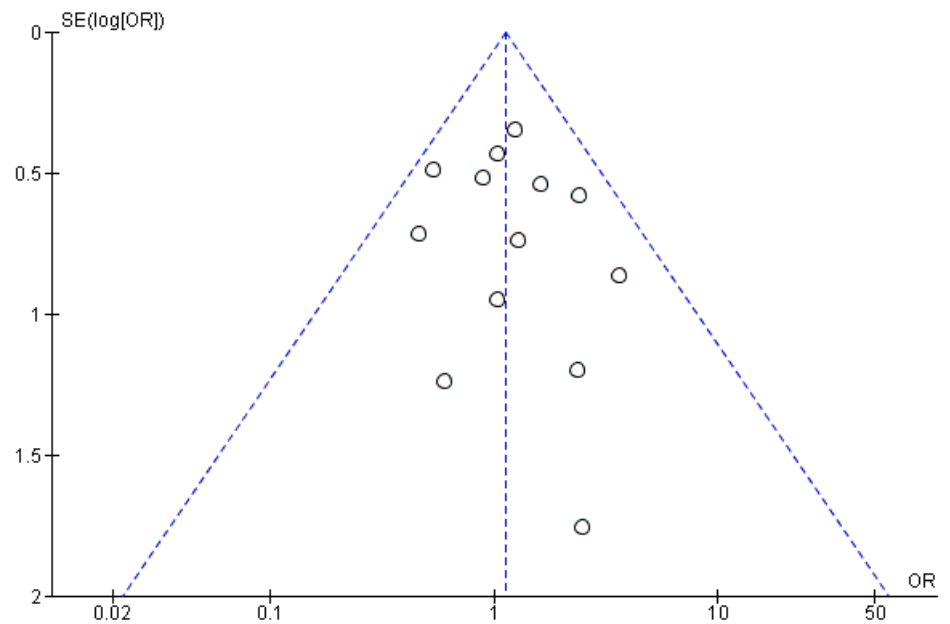

**Figure S1.** Funnel plot assessing for publication bias.
